# Supplementary material
Source: publisher figshare collection journal article supplement (https://acs.figshare.com/ndownloader/files/8412854)
Supplement: Supplementary file 1 [file 8412854]

data_Zr12_TPDC_modified
_audit_creation_date              2016-11-28
_audit_creation_method            'Materials Studio'
_symmetry_space_group_name_H-M    'P-31C'
_symmetry_Int_Tables_number       163
_symmetry_cell_setting            trigonal
loop_
_symmetry_equiv_pos_as_xyz
  x,y,z
  -y,x-y,z
  -x+y,-x,z
  -y,-x,-z+1/2
  -x+y,y,-z+1/2
  x,x-y,-z+1/2
  -x,-y,-z
  y,-x+y,-z
  x-y,x,-z
  y,x,z+1/2
  x-y,-y,z+1/2
  -x,-x+y,z+1/2
_cell_length_a                    23.0750
_cell_length_b                    23.0750
_cell_length_c                    49.8516
_cell_angle_alpha                 90.0000
_cell_angle_beta                  90.0000
_cell_angle_gamma                 120.0000
loop_
_atom_site_label
_atom_site_type_symbol
_atom_site_fract_x
_atom_site_fract_y
_atom_site_fract_z
_atom_site_U_iso_or_equiv
_atom_site_adp_type
_atom_site_occupancy
O1     O     0.62441   0.37560   0.67383   0.00000  Uiso   1.00
Zr2    Zr    0.71712   0.28288   0.65703   0.00000  Uiso   1.00
Zr3    Zr    0.61347   0.22694   0.78580   0.00000  Uiso   1.00
O4     O     0.51330   0.14360   0.79882   0.00000  Uiso   1.00
O5     O     0.56019   0.21849   0.87745   0.00000  Uiso   1.00
O6     O     0.55341   0.27670   0.79666   0.00000  Uiso   1.00
O7     O     0.63030   0.14360   0.79882   0.00000  Uiso   1.00
O8     O     0.81743   0.30060   0.83407   0.00000  Uiso   1.00
O9     O     0.56019   0.34170   0.87745   0.00000  Uiso   1.00
O10    O     0.48318   0.30060   0.83407   0.00000  Uiso   1.00
O11    O     0.55426   0.34489   0.75000   0.00000  Uiso   1.00
C12    C     0.45771  -1.56272  -0.01119   0.00000  Uiso   1.00
C13    C     0.52022  -1.52083  -0.02304   0.00000  Uiso   1.00
C14    C     0.56218  -1.45783  -0.01157   0.00000  Uiso   1.00
C15    C     0.54053  -1.54172  -0.04617   0.00000  Uiso   1.00
C16    C     0.49856  -1.60477  -0.05763   0.00000  Uiso   1.00
C17    C     0.51862  -1.62539  -0.08042   0.00000  Uiso   1.00
C18    C     0.58104  -1.58331  -0.09220   0.00000  Uiso   1.00
C19    C     0.62311  -1.52035  -0.08084   0.00000  Uiso   1.00
C20    C     0.60305  -1.49977  -0.05804   0.00000  Uiso   1.00
C21    C     0.60339  -1.60349  -0.11467   0.00000  Uiso   1.00
C22    C     0.78241   0.62646   0.29827   0.00000  Uiso   1.00
C23    C     0.77085   0.66577   0.31658   0.00000  Uiso   1.00
C24    C     0.82141   0.70538   0.33497   0.00000  Uiso   1.00
C25    C     0.70928   0.66540   0.31654   0.00000  Uiso   1.00
C26    C     0.65872   0.62581   0.29813   0.00000  Uiso   1.00
C27    C     0.59801   0.62549   0.29807   0.00000  Uiso   1.00
C28    C     0.58669   0.66474   0.31643   0.00000  Uiso   1.00
C29    C     0.63697   0.70435   0.33484   0.00000  Uiso   1.00
C30    C     0.69770   0.70468   0.33488   0.00000  Uiso   1.00
C31    C     0.52689   0.66696   0.31632   0.00000  Uiso   1.00
C32    C     0.88201   0.70585   0.33501   0.00000  Uiso   1.00
C33    C     0.89357   0.66654   0.31669   0.00000  Uiso   1.00
C34    C     0.84301   0.62692   0.29831   0.00000  Uiso   1.00
C35    C     0.95515   0.66690   0.31674   0.00000  Uiso   1.00
C36    C     1.00570   0.70649   0.33515   0.00000  Uiso   1.00
C37    C     1.06642   0.70681   0.33521   0.00000  Uiso   1.00
C38    C     1.07774   0.66756   0.31685   0.00000  Uiso   1.00
C39    C     1.02745   0.62795   0.29844   0.00000  Uiso   1.00
C40    C     0.96673   0.62762   0.29839   0.00000  Uiso   1.00
C41    C     1.13753   0.66534   0.31695   0.00000  Uiso   1.00
O42    O     0.33333   0.66667   0.36217   0.00000  Uiso   1.00
O43    O     0.33333   0.66667   0.27615   0.00000  Uiso   1.00
loop_
_geom_bond_atom_site_label_1
_geom_bond_atom_site_label_2
_geom_bond_distance
_geom_bond_site_symmetry_2
_ccdc_geom_bond_type
O1     Zr3     2.059   6_556 S
O1     Zr2     2.053   2_655 S
O1     Zr2     2.053   3_665 S
Zr2    O1      2.053   3_665 S
Zr2    O1      2.053   2_655 S
Zr2    O6      2.322   5_656 S
Zr2    O10     2.185   5_656 S
Zr2    O8      2.185   4_666 S
Zr2    O5      2.233   5_656 S
Zr2    O9      2.233   5_656 S
Zr2    O42     2.232   7_666 S
Zr3    O4      2.240   .     S
Zr3    O6      2.263   .     S
Zr3    O7      2.240   .     S
Zr3    O1      2.059   6_556 S
Zr3    O6      2.264   2_655 S
Zr3    O11     2.159   6_556 S
Zr3    O11     2.159   2_655 S
Zr3    O43     2.180   10    S
O4     C31     1.246   12_655 D
O5     Zr2     2.233   5_656 S
O5     C21     1.222   2_436 A
O6     Zr2     2.322   5_656 S
O6     Zr3     2.264   3_665 S
O7     C41     1.266   10_545 D
O8     Zr2     2.185   4_666 S
O8     C31     1.253   11_665 S
O9     Zr2     2.233   5_656 S
O9     C21     1.220   1_576 A
O10    Zr2     2.185   5_656 S
O10    C41     1.269   11_565 S
O11    Zr3     2.159   6_556 S
O11    Zr3     2.159   3_665 S
C12    C13     1.403   .     A
C12    C14     1.393   7_625 A
C13    C14     1.404   .     A
C13    C15     1.417   .     S
C14    C12     1.393   7_625 A
C15    C16     1.404   .     S
C15    C20     1.404   .     D
C16    C17     1.397   .     T
C17    C18     1.401   .     S
C18    C19     1.401   .     D
C18    C21     1.406   .     S
C19    C20     1.397   .     D
C21    O9      1.220   1_534 A
C21    O5      1.222   3_644 A
C22    C23     1.403   .     D
C22    C34     1.393   .     D
C23    C24     1.404   .     S
C23    C25     1.417   .     S
C24    C32     1.393   .     T
C25    C26     1.404   .     S
C25    C30     1.404   .     D
C26    C27     1.397   .     T
C27    C28     1.401   .     S
C28    C29     1.401   .     D
C28    C31     1.406   .     S
C29    C30     1.397   .     D
C31    O4      1.246   12_664 D
C31    O8      1.253   11_564 S
C32    C33     1.403   .     S
C33    C34     1.404   .     D
C33    C35     1.417   .     S
C35    C36     1.404   .     S
C35    C40     1.404   .     D
C36    C37     1.397   .     T
C37    C38     1.401   .     S
C38    C39     1.401   .     D
C38    C41     1.406   .     S
C39    C40     1.397   .     D
C41    O7      1.266   10_654 D
C41    O10     1.269   11_664 S
O42    Zr2     2.232   7_666 S
O42    Zr2     2.232   8_566 S
O42    Zr2     2.232   9_556 S
O43    Zr3     2.180   12_664 S
O43    Zr3     2.180   11_564 S
O43    Zr3     2.180   10_554 S
